# Supplementary material for: METAnnotatorX2: a Comprehensive Tool for Deep and Shallow Metagenomic Data Set Analyses
Source: PubMed Central journal article supplement (PMC8269244; doi:10.1128/msystems.00583-21), 2021-06-29
Supplement: msystems.00583-21-sf002.pdf [file msystems.00583-21-sf002.pdf]

### Metannotatorx2 DExA Index At Different Depth Level

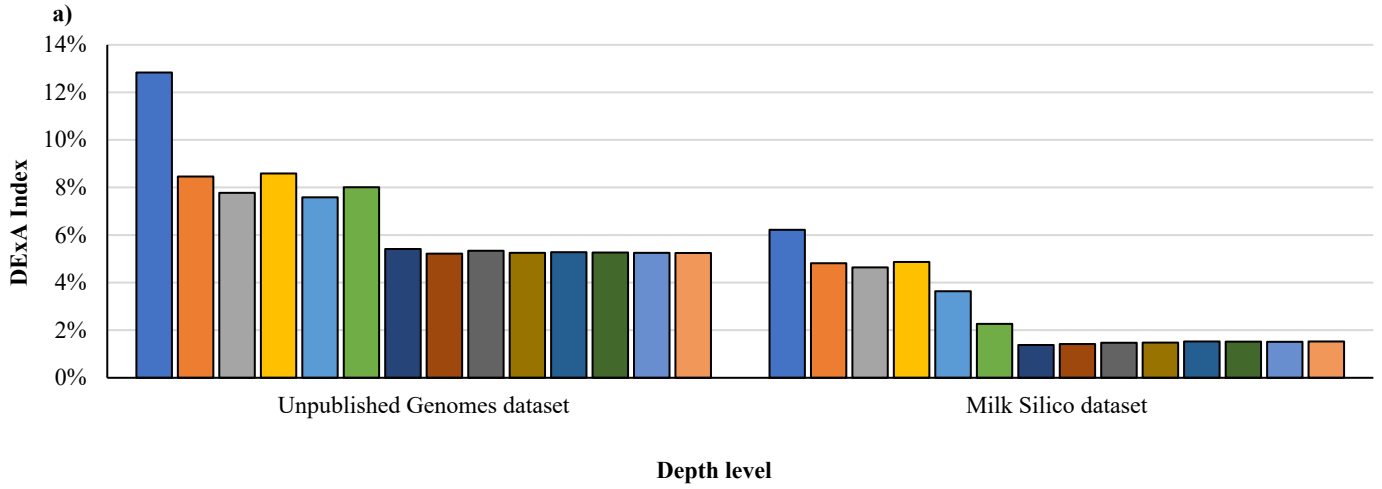

### MetannotatorX2 DExA Analysis

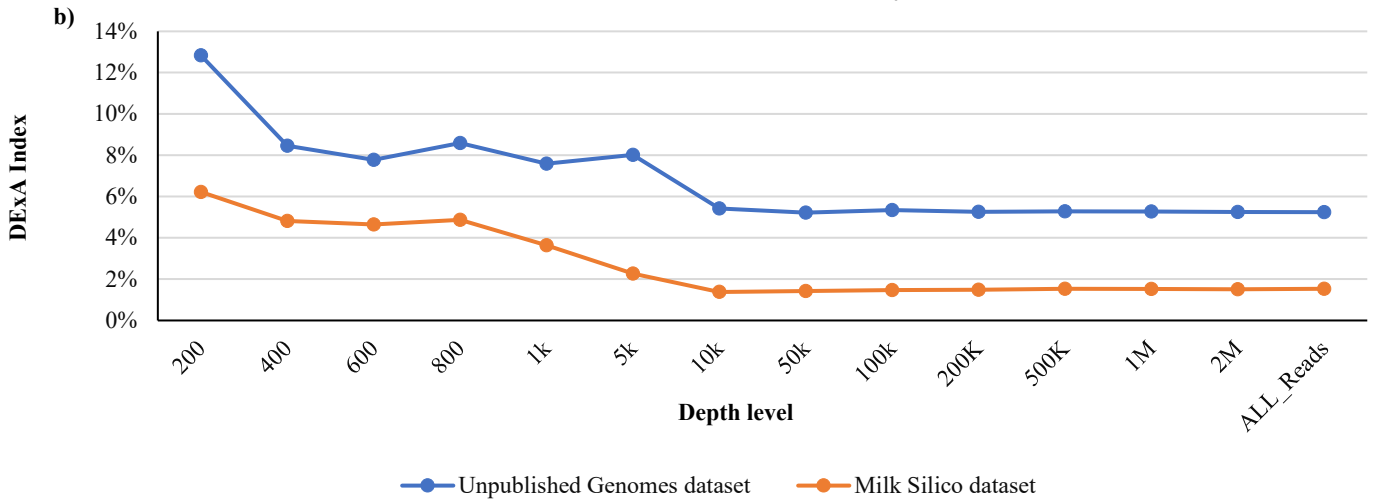

### MetannotatorX2 DExA Index Analysis \_ Real Cheese

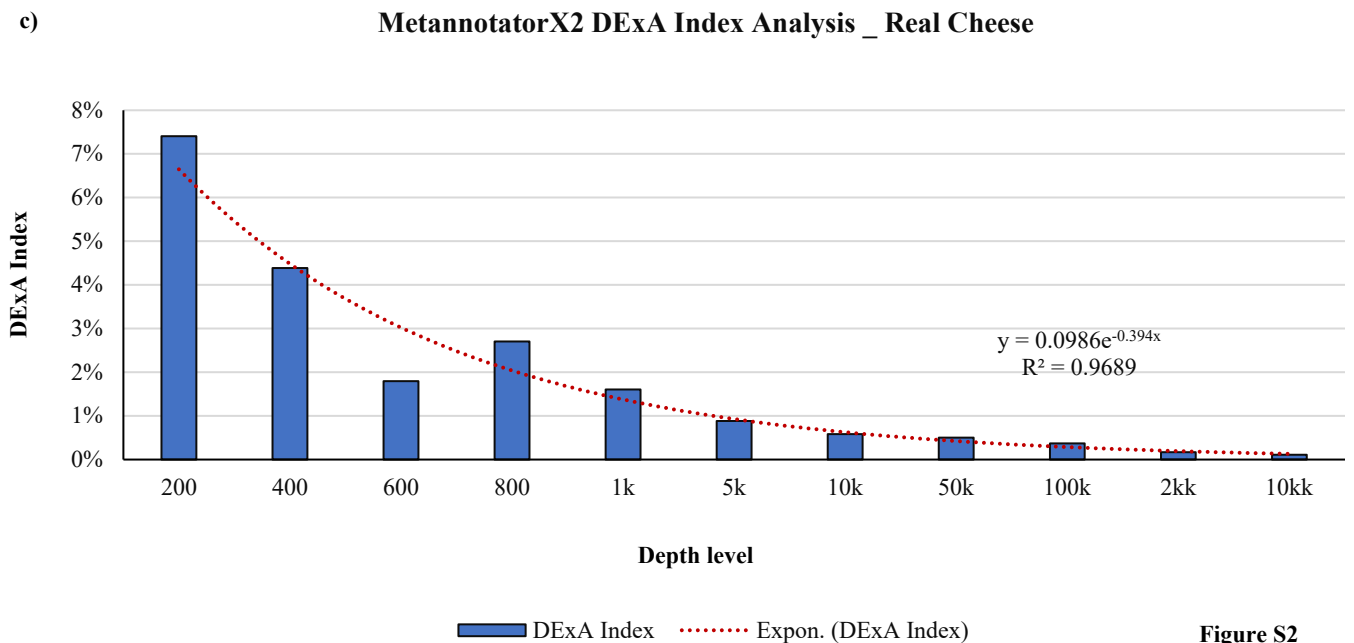

Figure S2
