# Supplementary material for: METAnnotatorX2: a Comprehensive Tool for Deep and Shallow Metagenomic Data Set Analyses
Source: PubMed Central journal article supplement (PMC8269244; doi:10.1128/msystems.00583-21), 2021-06-29
Supplement: msystems.00583-21-sf003.pdf [file msystems.00583-21-sf003.pdf]

### Profiled Taxa e-value

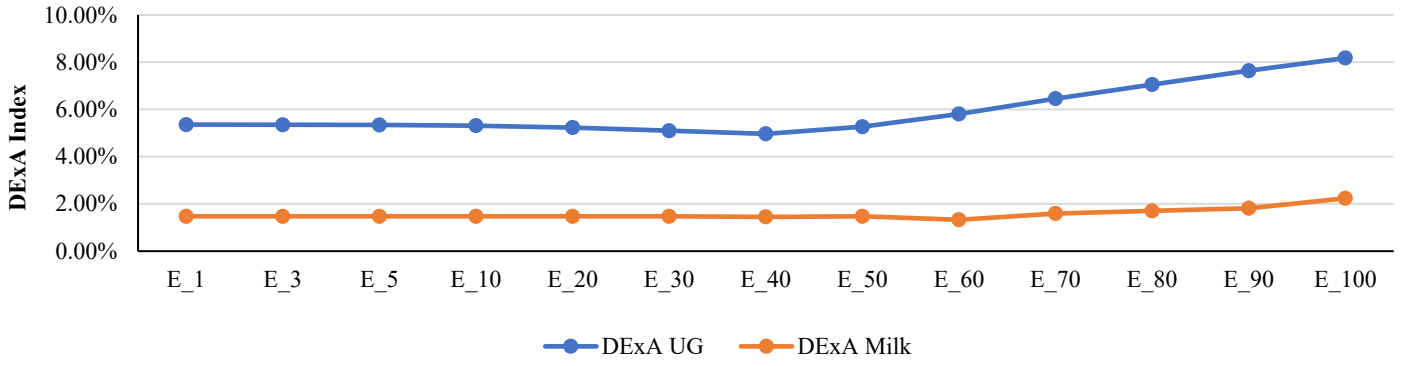

### Profiled Taxa Query Coverage

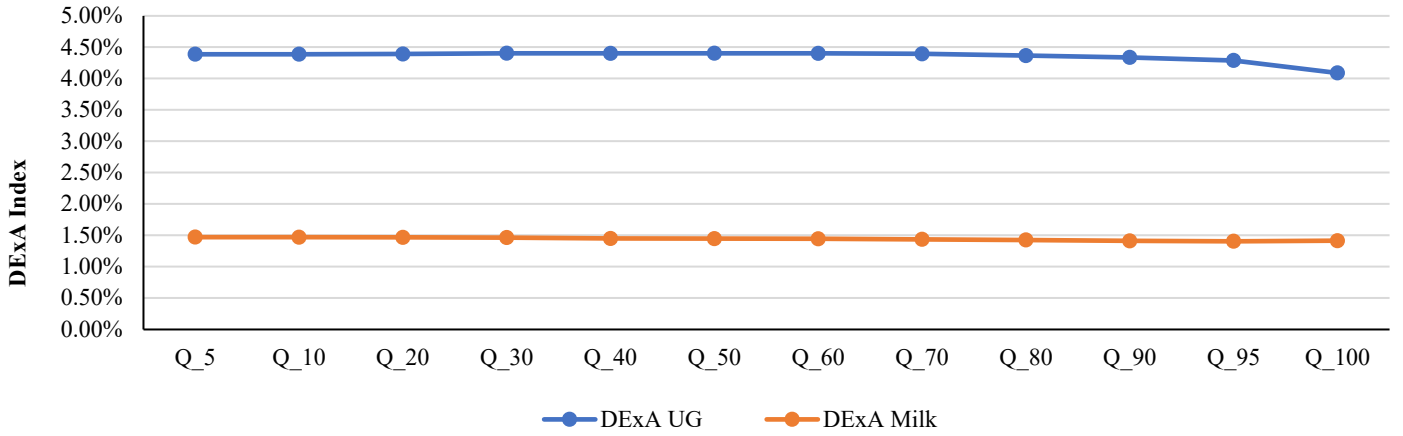

### Profiled Taxa Identity cut-off for genera

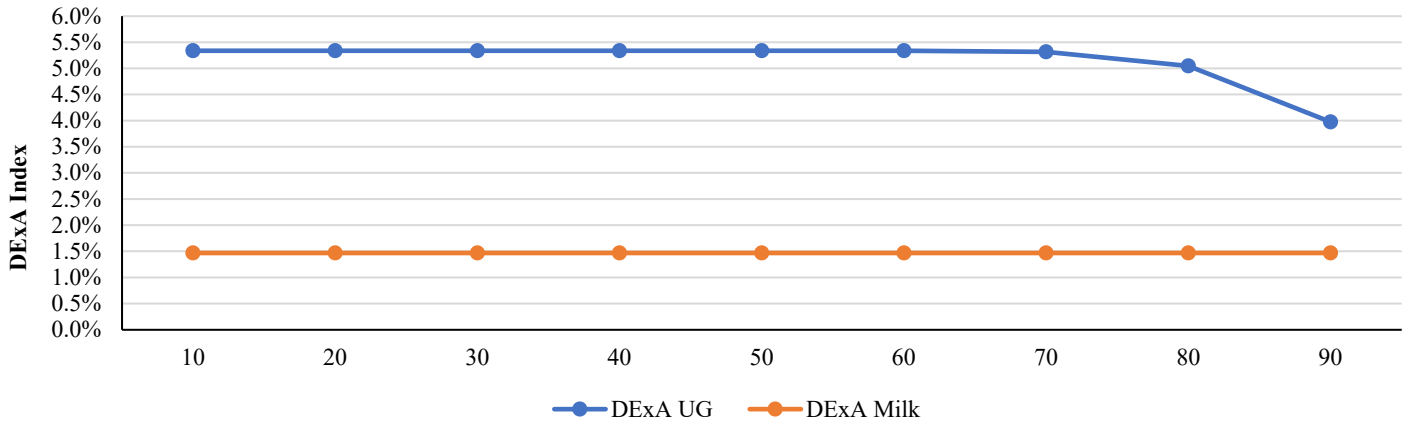

### Profiled Taxa Identity cut-off for species

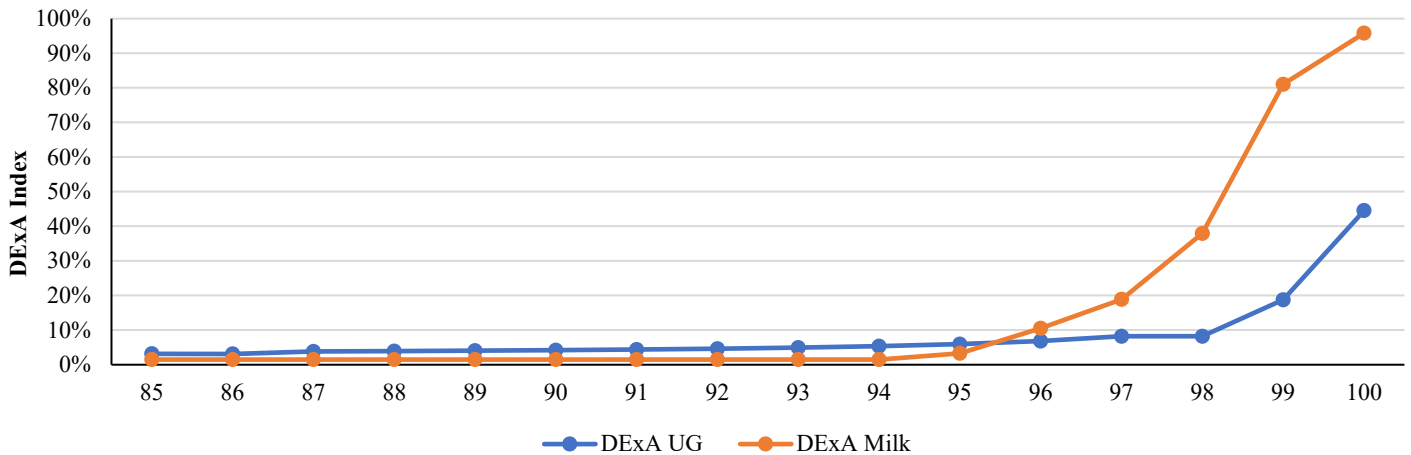

Figure S3
